# Supplementary material
Source: publisher figshare collection journal article supplement (https://acs.figshare.com/ndownloader/files/26824792)
Supplement: Supplementary file 1 [file 26824792]

Archive with 3 entries (3 files):
- info.xml
- jz1c00482_high_quality.mp4
- jz1c00482.pdf
