# Supplementary material
Source: publisher figshare collection journal article supplement (https://acs.figshare.com/ndownloader/files/26824792)
Supplement: Supplementary file 1 [file 26824792 › info.xml]

<presentation>
	<article>
		<title>Design of Heterostructures of MXene/Two-Dimensional Organic Frameworks for Na&#x2013;O2 Batteries with a New Mechanism and a New Descriptor</title>
		<doi>10.1021/acs.jpclett.1c00482</doi>
		<copyright>American Chemical Society</copyright>
		<narrator>Lai Xu</narrator>
		<contact>Lai Xu</contact>
		<contact-email>xulai15@suda.edu.cn</contact-email>
		<author-list>
			<author>Lai Xu</author>
		</author-list>
	</article>
	<slides height-width-ratio=".75">
		<slide audio-time="39">
			<subtitle/>
		</slide>
		<slide audio-time="32">
			<subtitle/>
		</slide>
		<slide audio-time="29">
			<subtitle/>
		</slide>
		<slide audio-time="54">
			<subtitle/>
		</slide>
		<slide audio-time="50">
			<subtitle/>
		</slide>
		<slide audio-time="23">
			<subtitle/>
		</slide>
		<slide audio-time="109">
			<subtitle/>
		</slide>
		<slide audio-time="68">
			<subtitle/>
		</slide>
	</slides>
	<audio duration="404"/>
</presentation>
